# Supplementary material for: Vegetation greening in the canadian arctic related to decadal warming
Source: Royal Society of Chemistry journal article supplement (doi:10.1039/b911677j), 2009-01-01
Supplement: b911677j.pdf [file b911677j.pdf]

Jia et al., Vegetation greening in the Canadian Arctic related to decadal warming

The Supplementary Information

**Table S1** Linear trends from autoregression for tundra biome and each bioclimate subzones

| Region               | Period    | a      | b      | Rate of change (%/yr) | r <sup>2</sup> | p      |
|----------------------|-----------|--------|--------|-----------------------|----------------|--------|
| Annual peak NDVI     |           |        |        |                       |                |        |
| Subzone A            | 1982-2003 | 0.0007 | 0.1424 | 0.49                  | 0.36           | <0.01  |
| Subzone B            | 1982-2003 | 0.001  | 0.1891 | 0.52                  | 0.52           | <0.005 |
| Subzone C            | 1982-2003 | 0.0021 | 0.2604 | 0.79                  | 0.61           | <0.001 |
| Subzone D            | 1982-2003 | 0.003  | 0.4475 | 0.67                  | 0.56           | <0.005 |
| Subzone E            | 1982-2003 | 0.0022 | 0.594  | 0.46                  | 0.44           | <0.01  |
| Tundra               | 1982-1991 | 0.0025 | 0.3742 | 0.66                  | 0.56           | <0.005 |
| Tundra               | 1993-2003 | 0.004  | 0.3834 | 1.0                   | 0.71           | <0.001 |
| Tundra               | 1982-2003 | 0.0021 | 0.3728 | 0.56                  | 0.60           | <0.001 |
| Tundra <70N          | 1982-2006 | 0.0023 | 0.5285 | 0.47                  | 0.57           | <0.001 |
| Time-integrated NDVI |           |        |        |                       |                |        |
| Subzone A            | 1982-2003 | 0.0019 | 0.8611 | 0.22                  | 0.09           | 0.082  |
| Subzone B            | 1982-2003 | 0.0032 | 1.0143 | 0.31                  | 0.16           | <0.05  |
| Subzone C            | 1982-2003 | 0.0117 | 1.3444 | 0.69                  | 0.36           | <0.01  |
| Subzone D            | 1982-2003 | 0.0214 | 2.6817 | 0.79                  | 0.41           | <0.01  |
| Subzone E            | 1982-2003 | 0.0275 | 3.6858 | 0.74                  | 0.45           | <0.005 |
| Tundra               | 1982-1991 | 0.0225 | 2.1798 | 1.0                   | 0.43           | <0.005 |
| Tundra               | 1993-2003 | 0.03   | 2.2688 | 1.3                   | 0.61           | <0.001 |
| Tundra               | 1982-2003 | 0.0159 | 2.1817 | 0.73                  | 0.48           | <0.005 |
| Tundra <70N          | 1982-2006 | 0.0251 | 3.1803 | 0.78                  | 0.52           | <0.005 |
